# Supplementary material
Source: publisher site journal article supplement (https://www.degruyterbrill.com/publication/isbn/9783050062327/downloadAsset/9783050062327_Buchinformation.pdf)
Supplement: Supplementary file 1 [file 9783050062327_Buchinformation.pdf]

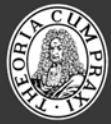

# Akademie Verlag

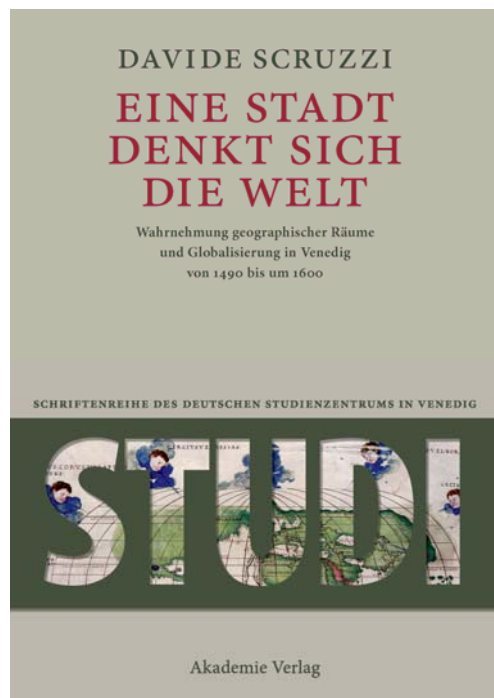

Davide Scruzzi

## Eine Stadt denkt sich die Welt

*Wahrnehmung geographischer Räume  
und Globalisierung in Venedig von 1490  
bis um 1600*

*STUDI. Schriftenreihe des Deutschen Studienzentrums  
in Venedig. Neue Folge, Band 3*

2010. X, 365 S. – 15 Abb. – 170 x 240 mm,  
Festeinband, € 69,80  
ISBN 978-3-05-004665-5

Im 16. Jahrhundert verlor Venedig durch die Entdeckung Amerikas und vor allem durch den neuen Seeweg nach Indien die dominante Stellung im Fernhandel. Dies traf die Venezianer völlig unvorbereitet und die Anpassung an die neuen Verhältnisse ging nur langsam vonstatten. Die städtischen Diskurse erfassten die neue Realität lange nur unzureichend. Ein Grund dafür liegt in der Art, wie geographische Räume wahrgenommen wurden. Vor allem unter dem starken ökonomischen Druck des neuen globalen Pfefferhandels erweiterte sich die Betrachtungsweise. Allerdings sind schon anfangs des 16. Jahrhunderts einzelne Personengruppen auszumachen, die sich ohne unmittelbaren Nutzen für die Entdeckungsfahrten interessierten.

Die vorliegende breit angelegte Studie untersucht anhand von Texten und Weltkarten jener Zeit die Veränderung der Wahrnehmung weit entfernter und nah gelegener Regionen. Es wird gezeigt, wie sich unter dem Einfluss von Faktoren aus Politik, Wirtschaft, Kultur und Religion bei den Menschen der Lagunenstadt schließlich eine philosophisch und ästhetisch inspirierte Faszination für das neue Bild der Welt entwickelte. Ereignisse und Entwicklungen werden den Dimensionen der Wahrnehmung gegenübergestellt. Die Art und Weise, wie Menschen die geographischen Räume aufgefasst haben, erscheint damit als wichtiger Faktor für politisches und ökonomisches Handeln – ein Aspekt, der bisher nicht im Fokus der Forschung war.

In dieser originellen Analyse bis heute anhaltender Prozesse wird deutlich, wie sich die globale Realität von der entsprechenden Wahrnehmung unterscheiden kann. Das Buch lässt sich im Übrigen als Übersicht über die geographische Literatur im Venedig des 16. Jahrhunderts nutzen.
